# Supplementary material for: Facile Morphology and Porosity Regulation of Zeolite ZSM-5 Mesocrystals with Synergistically Enhanced Catalytic Activity and Shape Selectivity
Source: MDPI journal article supplement (doi:10.3390/nano12091601), 2022-05-09
Supplement: s1 [file s1]

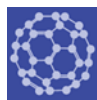

## Supplementary Materials

# Facile Morphology and Porosity Regulation of Zeolite ZSM-5 Mesocrystals with Synergistically Enhanced Catalytic Activity and Shape Selectivity

Feng Lin <sup>1,†</sup>, Zhaoqi Ye <sup>1,†</sup>, Lingtao Kong <sup>1</sup>, Peng Liu <sup>2</sup>, Yahong Zhang <sup>1</sup>, Hongbin Zhang <sup>2,\*</sup> and Yi Tang <sup>1,\*</sup>

<sup>1</sup> Department of Chemistry, Shanghai Key Laboratory of Molecular Catalysis and Innovative Materials, and Laboratory of Advanced Materials, Fudan University, Shanghai 200433, China; 20210220046@fudan.edu.cn (F.L.); 17110220035@fudan.edu.cn (Z.Y.); konglingtao@fudan.edu.cn (L.K.); zhangyh@fudan.edu.cn (Y.Z.)

<sup>2</sup> Institute for Preservation and Conservation of Chinese Ancient Books, Fudan University Library, Fudan University, Shanghai 200433, China; liupengfdu@fudan.edu.cn

\* Correspondence: zhanghongbin@fudan.edu.cn (H.Z.); yitang@fudan.edu.cn (Y.T.)

† These authors contributed equally to this work.

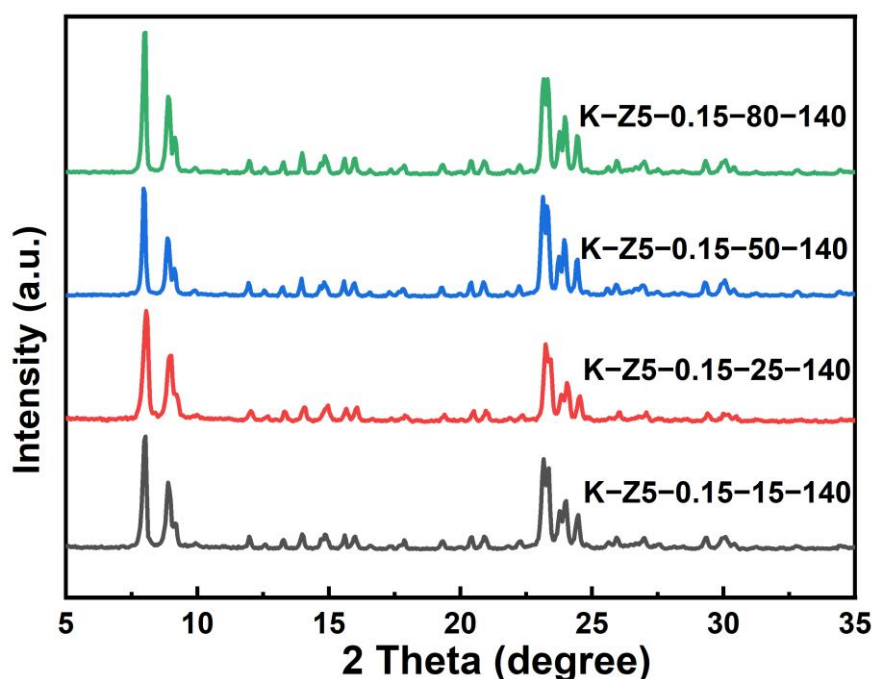

Figure S1. XRD patterns of K-Z5-0.15-y-140 (y = 15/25/50/80) samples.

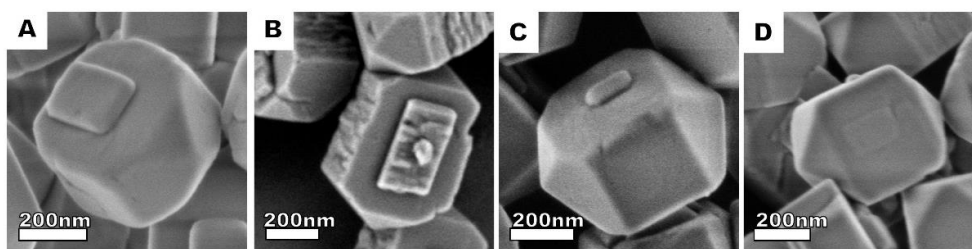

Figure S2. The SEM images of the products synthesized in the K<sup>+</sup> system with H<sub>2</sub>O/SiO<sub>2</sub> = (A) 15, (B) 25, (C) 50 and (D) 80.

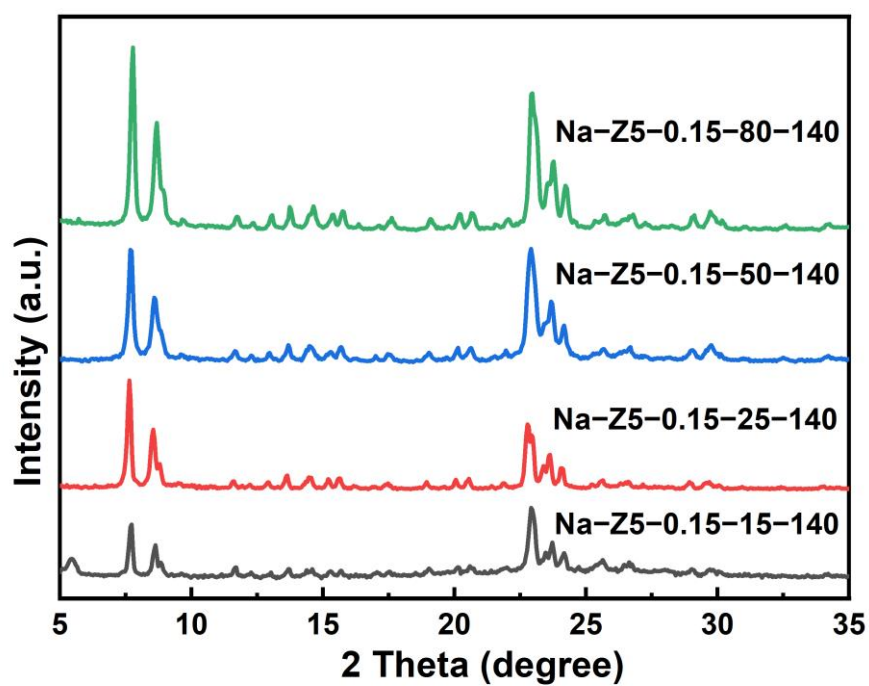

**Figure S3.** XRD patterns of Na-Z5-0.15-y-140 (y = 15/25/50/80) samples.

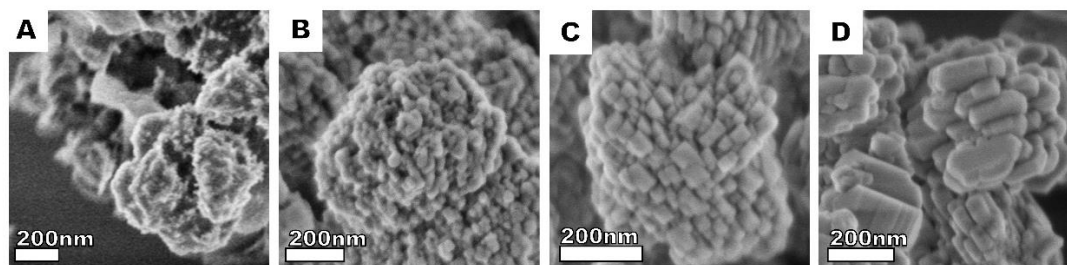

**Figure S4.** The SEM images of the products synthesized in the Na<sup>+</sup> system with H<sub>2</sub>O/SiO<sub>2</sub> = (A) 15, (B) 25, (C) 50 and (D) 80.

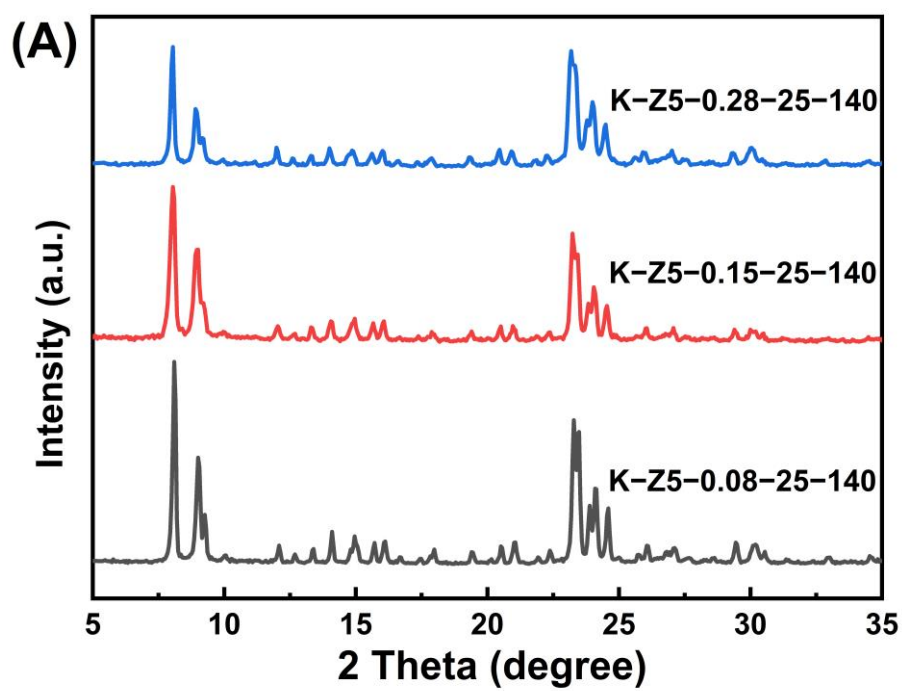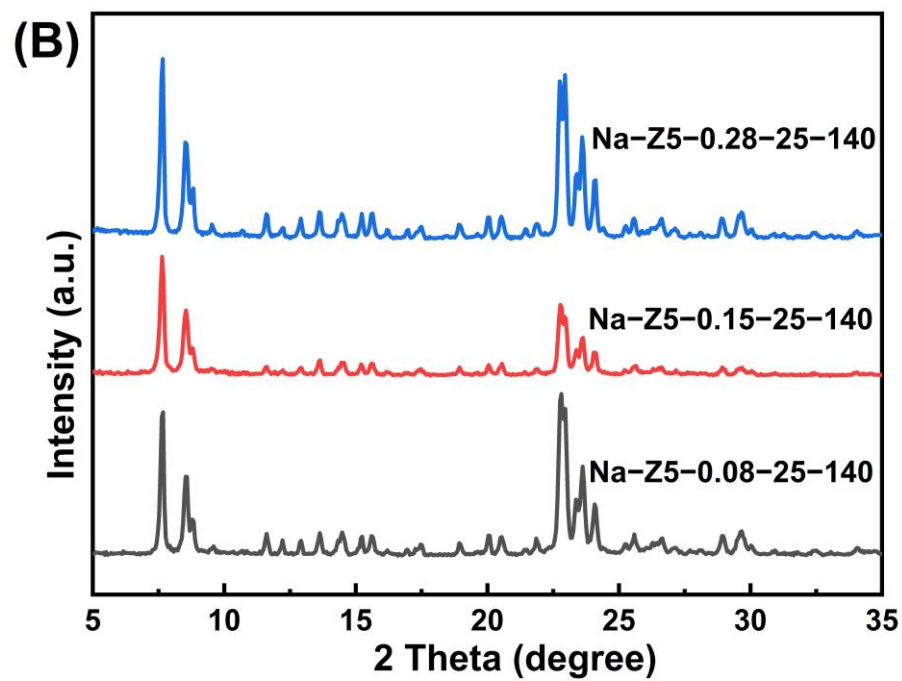

**Figure S5.** XRD patterns of (A)K-Z5-x-25-140 ( $x = 0.08/0.15/0.28$ ) and (B)Na-Z5-x-25-140 ( $x = 0.08/0.15/0.28$ ) samples.

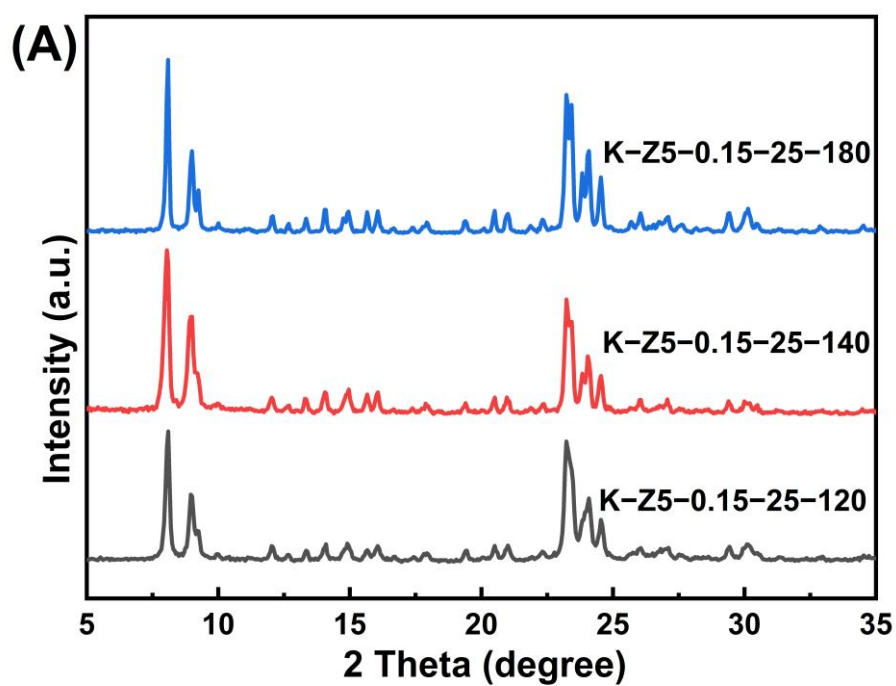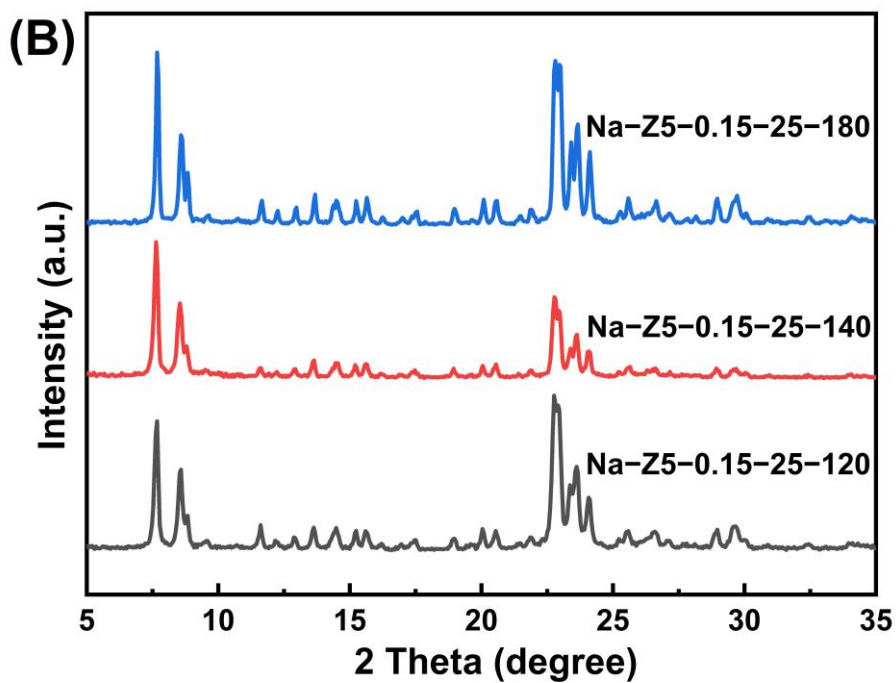

**Figure S6.** XRD patterns of (A) K-Z5-0.15-25- $T$  ( $T = 120/140/180$ ) and (B) Na-Z5-0.15-25- $T$  ( $T = 120/140/180$ ) samples.

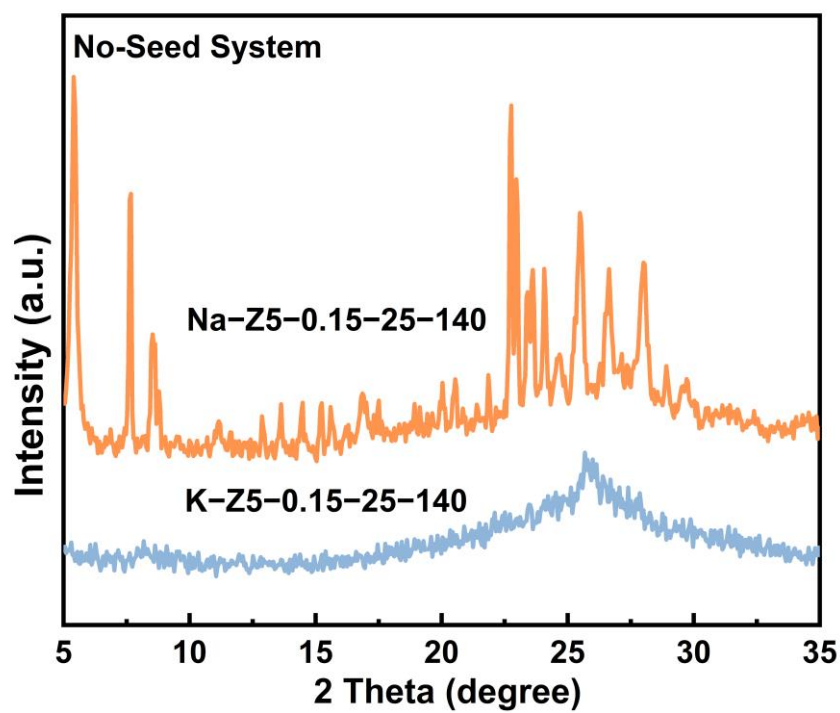

**Figure S7.** XRD patterns of K-Z5-0.15-25-140 and Na-Z5-0.15-25-140 samples synthesized without seeds after 72 hours of hydrothermal treatment.

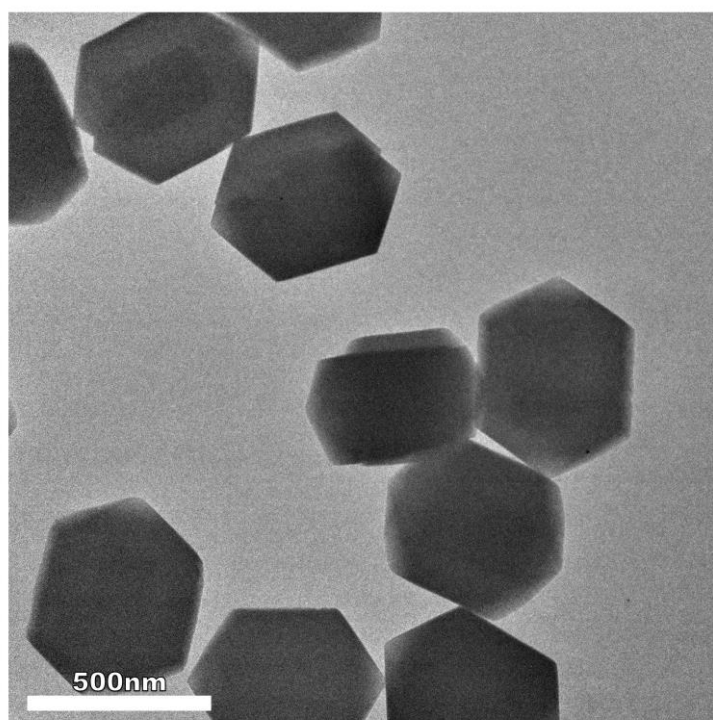

**Figure S8.** The TEM image of the SC-Na-Z5.

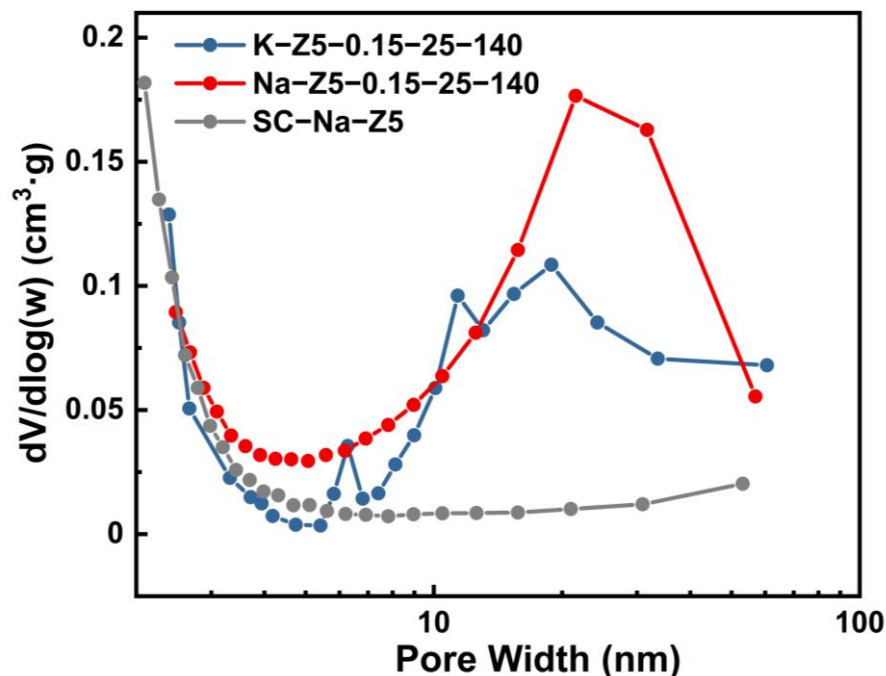

**Figure S9.** The pore size distribution of the SC-Na-Z5, K-Z5-0.15-25-140 and Na-Z5-0.15-25-140 samples.

**Table S1.** The textural properties of calcined Na-Z5-0.15-25-140, K-Z5-0.15-25-140 and SC-Na-Z5 products.

| Samples           | $S_{\text{BET}}^a$<br>( $\text{m}^2\cdot\text{g}^{-1}$ ) | $S_{\text{micro}}^b$<br>( $\text{m}^2\cdot\text{g}^{-1}$ ) | $S_{\text{ext}}^b$<br>( $\text{m}^2\cdot\text{g}^{-1}$ ) | $V_{\text{micro}}^b$<br>( $\text{cm}^3\cdot\text{g}^{-1}$ ) | $V_{\text{meso}}^c$<br>( $\text{cm}^3\cdot\text{g}^{-1}$ ) |
|-------------------|----------------------------------------------------------|------------------------------------------------------------|----------------------------------------------------------|-------------------------------------------------------------|------------------------------------------------------------|
| Na-Z5-0.15-25-140 | 407                                                      | 309                                                        | 98                                                       | 0.120                                                       | 0.180                                                      |
| K-Z5-0.15-25-140  | 399                                                      | 336                                                        | 63                                                       | 0.138                                                       | 0.149                                                      |
| SC-Na-Z5          | 387                                                      | 348                                                        | 39                                                       | 0.141                                                       | 0.043                                                      |

<sup>a</sup> determined by the relative pressure  $P/P_0$  from 0.005 to 0.035. <sup>b</sup> by t-plot method. <sup>c</sup> using BJH method.

**Table S2.** The acid amounts measured by  $\text{NH}_3$ -TPD of  $\text{H}^+$ -form Na-Z5-0.15-25-140, K-Z5-0.15-25-140 and SC-Na-Z5 products.

| Samples           | Weak acid ( $\mu\text{mol}\cdot\text{g}^{-1}$ ) <sup>a</sup> | Strong acid ( $\mu\text{mol}\cdot\text{g}^{-1}$ ) <sup>b</sup> |
|-------------------|--------------------------------------------------------------|----------------------------------------------------------------|
| Na-Z5-0.15-25-140 | 459                                                          | 303                                                            |
| K-Z5-0.15-25-140  | 430                                                          | 281                                                            |
| SC-Na-Z5          | 479                                                          | 303                                                            |

<sup>a</sup> The amounts of weak acid sites were measured by the amounts of  $\text{NH}_3$  desorbed at 80–280 °C.

<sup>b</sup> The amounts of strong acid sites were measured by the amounts of  $\text{NH}_3$  desorbed at 280–550 °C.
